# Supplementary material
Source: Springer Nature journal article supplement (https://www.springermedizin.de/resource/supplementary/12885_2012_3806_MOESM1_ESM.pdf/9464368)

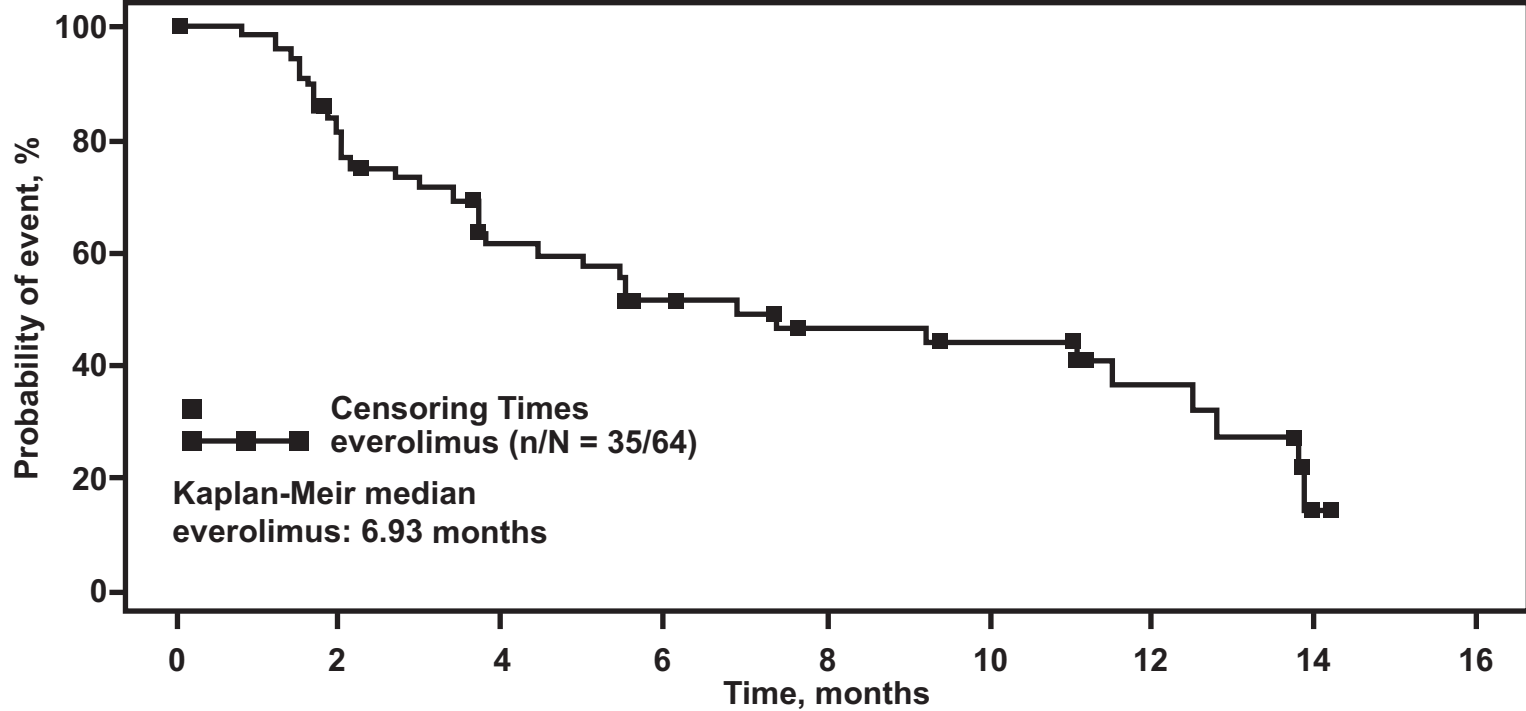

**No. of patients still at risk**

|            |    |    |    |    |    |    |   |   |   |
|------------|----|----|----|----|----|----|---|---|---|
| everolimus | 64 | 45 | 31 | 23 | 17 | 15 | 8 | 1 | 0 |
|------------|----|----|----|----|----|----|---|---|---|

Supplement: MOESM1 [file 9464368]
